# Supplementary material
Source: PubMed Central journal article supplement (PMC4344948)
Supplement: CJP-2015-vol60-February-62-76-eTable-4.pdf [file CJP-2015-vol60-February-62-76-eTable-4.pdf]

Gorman DA, Gardner DM, Murphy AL, et al. Canadian guidelines on pharmacotherapy for disruptive and aggressive behaviour in children and adolescents with attention-deficit hyperactivity disorder, oppositional defiant disorder, or conduct disorder. *Can J Psychiatry*. 2015;60(2):62–76.

**eTable 4 Specific side effects of medications considered for treating oppositional behaviour, conduct problems, and aggression in children and adolescents with ADHD, ODD, or CD**

| Medication                                          | Side Effects                                                                                                                                         |                                                                                                                                                                                                                                                    |                                                                                                  |                                                                              |
|-----------------------------------------------------|------------------------------------------------------------------------------------------------------------------------------------------------------|----------------------------------------------------------------------------------------------------------------------------------------------------------------------------------------------------------------------------------------------------|--------------------------------------------------------------------------------------------------|------------------------------------------------------------------------------|
|                                                     | Very Common (≥10%)                                                                                                                                   | Common (1% to <10%)                                                                                                                                                                                                                                | Uncommon (0.1% to <1%)                                                                           | Rare (<0.1%)                                                                 |
| Psychostimulants (methylphenidate and amphetamines) | Decreased appetite/weight loss<br>Insomnia<br>Headache<br>Abdominal pain<br>Small increases in heart rate and blood pressure                         | Irritability and other emotional changes<br>Social withdrawal<br>Nausea/vomiting<br>Dry mouth<br>Modest growth suppression*63                                                                                                                      | Manic/psychotic symptoms64                                                                       | Priapism65<br>Serious cardiovascular events**63, 66, 67                      |
| Atomoxetine                                         | Gastrointestinal symptoms<br>Sedation<br>Small increases in heart rate and blood pressure<br>Decreased appetite/weight loss<br>Headache<br>Dry mouth | Insomnia<br>Irritability and other emotional changes<br>Dizziness                                                                                                                                                                                  | Manic/psychotic symptoms64<br>Possible increased risk of suicide-related events29–31<br>Seizures | Severe liver injury68<br>Priapism65<br>Serious cardiovascular events**63, 67 |
| Guanfacine                                          | Sedation<br>Headache                                                                                                                                 | Bradycardia<br>Hypotension<br>Rebound tachycardia and hypertension (with abrupt discontinuation of higher doses)34<br>Dizziness<br>Irritability and other emotional changes<br>Gastrointestinal symptoms<br>Dry mouth<br>Modest QTc prolongation49 |                                                                                                  | ECG abnormalities69, 70                                                      |
| Clonidine                                           | Sedation<br>Dry mouth                                                                                                                                | Bradycardia<br>Hypotension<br>Rebound tachycardia and hypertension (with abrupt                                                                                                                                                                    |                                                                                                  | ECG abnormalities71, 72                                                      |

|                |                                                                                                 |                                                                                                                                                                                                                                                        |                                                                                                                                                                                                                                                                                         |                                                                                                                   |
|----------------|-------------------------------------------------------------------------------------------------|--------------------------------------------------------------------------------------------------------------------------------------------------------------------------------------------------------------------------------------------------------|-----------------------------------------------------------------------------------------------------------------------------------------------------------------------------------------------------------------------------------------------------------------------------------------|-------------------------------------------------------------------------------------------------------------------|
|                |                                                                                                 | discontinuation of higher doses) <sup>35</sup><br>Dizziness<br>Irritability and other emotional changes<br>Gastrointestinal symptoms<br>Headache                                                                                                       |                                                                                                                                                                                                                                                                                         |                                                                                                                   |
| Risperidone*** | Sedation<br>Extrapyramidal symptoms (including akathisia)<br>Weight gain<br>Increased prolactin | Orthostatic changes<br>Elevated lipids<br>Impaired glycemic tolerance/diabetes<br>Modest QTc prolongation <sup>73</sup>                                                                                                                                | Seizures<br>Neutropenia<br>Tardive dyskinesia/dystonia<br>Neuroleptic malignant syndrome                                                                                                                                                                                                |                                                                                                                   |
| Quetiapine***  | Sedation<br>Weight gain<br>Orthostatic changes                                                  | Elevated lipids<br>Impaired glycemic tolerance/diabetes<br>Extrapyramidal symptoms (including akathisia)<br>Anticholinergic symptoms (typically minimal) <sup>74</sup><br>Modest QTc prolongation <sup>73</sup><br>Thyroid abnormalities <sup>53</sup> | Seizures<br>Neutropenia<br>Tardive dyskinesia<br>Neuroleptic malignant syndrome                                                                                                                                                                                                         |                                                                                                                   |
| Haloperidol    | Sedation<br>Extrapyramidal symptoms (including akathisia)<br>Increased prolactin                | Orthostatic changes<br>Anticholinergic symptoms<br>Weight gain<br>Elevated lipids <sup>75</sup><br>Impaired glycemic tolerance/diabetes <sup>75, 76</sup><br>Modest QTc prolongation <sup>73</sup><br>Tardive dyskinesia/dystonia                      | Seizures<br>Neutropenia<br>Neuroleptic malignant syndrome                                                                                                                                                                                                                               |                                                                                                                   |
| Valproate      | Sedation<br>Insomnia<br>Gastrointestinal symptoms<br>Headache<br>Dizziness<br>Tremor            | Weight gain<br>Hair loss<br>Ataxia<br>Cognitive disturbances<br>Mild increase in liver enzymes <sup>77</sup><br>Thrombocytopenia <sup>78</sup><br>Polycystic ovarian syndrome <sup>79</sup><br>Decreased bone density <sup>80</sup>                    | Severe hepatotoxicity <sup>81</sup><br>Pancreatitis <sup>82</sup><br>Hyperammonemia <sup>83</sup><br>Encephalopathy (with or without hyperammonemia) <sup>84</sup><br>Parkinsonism <sup>85</sup><br>Hypofibrinogenemia <sup>78</sup><br>Renal toxicity (Fanconi syndrome) <sup>77</sup> | Severe hematological alterations <sup>78</sup><br>Possible increased risk of suicide-related events <sup>87</sup> |

|               |                                                                             |                                                                                                                                                                                                                      |                                                                                                  |                                                                                                                                                                                                                                                                     |
|---------------|-----------------------------------------------------------------------------|----------------------------------------------------------------------------------------------------------------------------------------------------------------------------------------------------------------------|--------------------------------------------------------------------------------------------------|---------------------------------------------------------------------------------------------------------------------------------------------------------------------------------------------------------------------------------------------------------------------|
|               |                                                                             |                                                                                                                                                                                                                      | Severe skin reactions<br>(Stevens-Johnson syndrome,<br>toxic epidermal necrolysis) <sup>86</sup> |                                                                                                                                                                                                                                                                     |
| Lithium       | Sedation<br>Weight gain<br>Gastrointestinal symptoms<br>Polyuria/polydipsia | Tremor<br>Acne/rash<br>Hair loss<br>Hypothyroidism<br>Hyperparathyroidism<br>ECG abnormalities<br>Dose-related toxicity                                                                                              | End-stage renal failure <sup>88, 89</sup>                                                        | Nephrotic syndrome <sup>90</sup>                                                                                                                                                                                                                                    |
| Carbamazepine | Gastrointestinal symptoms<br>Dizziness<br>Ataxia<br>Cognitive disturbances  | Sedation<br>Weight gain<br>Rash<br>Visual disturbances<br>Mild increase in liver<br>enzymes <sup>91</sup><br>Mild leukopenia <sup>91</sup><br>Hyponatremia <sup>92</sup><br>Decreased bone density <sup>80, 93</sup> | Severe skin reactions<br>(Stevens-Johnson syndrome,<br>toxic epidermal necrolysis) <sup>86</sup> | ECG abnormalities <sup>94</sup><br>Hypothyroidism <sup>95</sup><br>Severe hematological<br>alterations <sup>78, 91</sup><br>Severe hepatotoxicity <sup>91</sup><br>Pancreatitis <sup>91</sup><br>Possible increased risk of<br>suicide-related events <sup>87</sup> |

Note: Categories for side effect rates (very common, common, uncommon, and rare) are based on international standards.<sup>96</sup> Side effect rates for each medication were derived from the trials in the accompanying systematic review,<sup>14, 15</sup> other reports as cited in the table, and the drug information resource Micromedex 2.0.<sup>97</sup> When paediatric data were not available, side effect rates were estimated from adult data. When information was missing or inconsistent, we categorized side effects based on our clinical experience. Not all potential side effects are included.

\*In the Multimodal Treatment Study of Children with ADHD, psychostimulant-naïve school-age children with ADHD who were treated with a psychostimulant for three years showed average growth of 2.0 cm and 2.7 kg less than children with ADHD who did not receive medication.<sup>98</sup> The groups were not determined by random assignment, however, and the unmedicated children had a growth rate that was greater than expected. In addition, the clinical significance of the growth discrepancy between the medicated and unmedicated children is subject to debate, and the effect of prolonged psychostimulant treatment on final height is unclear.<sup>63</sup>

\*\*Although very rare cases of serious cardiovascular events, including sudden death, have been reported in children and adolescents taking psychostimulants or atomoxetine, several large cohort studies have not found a significant association in children and adolescents without cardiac risk factors.<sup>99–102</sup>

\*\*\*Evidence-based guidelines for monitoring the safety of second-generation antipsychotics, and managing their metabolic complications and extrapyramidal side effects, have been developed as part of the Canadian Alliance for Monitoring Effectiveness and Safety of Antipsychotics in Children (CAMESA) Guideline Project.<sup>53–55</sup>
